# Supplementary material for: Correlating Photoreceptor Mosaic Structure to Clinical Findings in Stargardt Disease
Source: PubMed Central journal article supplement — Transl Vis Sci Technol. 2016 Mar 11;5(2):6. doi: 10.1167/tvst.5.2.6 (PMC4790429; doi:10.1167/tvst.5.2.6), 2016-03-11
Supplement: i2164-2591-5-2-6-s01.pdf [file i2164-2591-5-2-6-s01.pdf]

| <b>ABCA4 Mutations</b>      | <b>Reported Pathogenicity</b>                                                                                        | <b>Subjects with Mutation</b>          |
|-----------------------------|----------------------------------------------------------------------------------------------------------------------|----------------------------------------|
| c.570+1888 A>G (homozygous) | Likely benign                                                                                                        | JC_10296, JC_10461, JC_10469           |
| c.676 C>T; p.226 Arg>Cys    | Probably Damaging                                                                                                    | KS_10306                               |
| c.769-1718_c.769-1717insTAT | Likely benign                                                                                                        | JC_10461                               |
| c.1240-14 C>T               | Not likely pathogenic                                                                                                | TC_1048                                |
| c.1622 T>C; p.541 Leu>Pro   | Reported mutation <sup>39, 70</sup>                                                                                  | KS_10150                               |
| c.1804 C>T; p.602 Arg>Trp   | Reported mutation <sup>39, 71, 72</sup>                                                                              | KS_10108                               |
| c.1957 C>T; p.653 Arg>Cys   | Reported mutation <sup>73</sup>                                                                                      | KS_10241, KS_10242                     |
| c.2041 C>T; p.681 Arg>Stop  | Reported mutation <sup>70</sup>                                                                                      | DH_1162                                |
| c.2160+1 G>T*               | Splice site mutation (Likely damaging due to altered canonical splice site; Human Splice Finder v3.0 <sup>27</sup> ) | KS_1027, TC_1048                       |
| c.2588 G>C; p.863 Gly>Ala   | Reported mutation <sup>39, 70, 74, 75</sup>                                                                          | KS_10108                               |
| c.2919-927 T>A              | VUS (Altered splice enhancer; Human Splice Finder v3.0 <sup>27</sup> )                                               | KS_10306                               |
| c.3113 C>T; p.1038 Ala>Val  | Reported mutation <sup>70, 74, 75</sup>                                                                              | KS_10150                               |
| c.3259 G>A; p.1087 Glu>Lys  | Reported mutation <sup>76</sup>                                                                                      | DH_10019                               |
| c.4469 G>A; p.1490 Cys>Tyr  | Probable disease-causing <sup>77</sup>                                                                               | DH_1158                                |
| c.4577 C>T; p.1526 Thr>Met  | Reported mutation <sup>39</sup>                                                                                      | JC_10461, JC_10469                     |
| c.5018+8 A>G                | VUS (No impact on splicing; Human Splice Finder v3.0 <sup>27</sup> )                                                 | KS_10306                               |
| c.5603 A>T; p.1868 Asn>Ile  | VUS; Benign; Non-disease-causing <sup>78</sup>                                                                       | KS_1027, TC_1048, DH_1158              |
| c.5682 G>C; p.1894 Leu>Leu  | Not likely pathogenic; Non-disease-causing                                                                           | TC_1048, DH_1158                       |
| c.5714+5 G>A                | Reported mutation <sup>39, 70, 74</sup>                                                                              | KS_10150                               |
| c.5882 G>A; p.1961 Gly>Glu  | Reported mutation <sup>39, 54, 70, 75</sup>                                                                          | KS_10242, JC_10296, JC_10461, JC_10469 |
| c.6079 C>T; p.2027 Leu>Phe  | Reported mutation <sup>77</sup>                                                                                      | JC_10222                               |
| c.6320 G>A; p.2107 Arg>His  | Reported mutation <sup>76</sup>                                                                                      | JC_10222                               |
| c.6449 G>A; p.2150 Cys>Tyr  | Reported mutation <sup>76</sup>                                                                                      | JC_10296                               |
| c.6730-579 T>C              | VUS (Altered splice enhancer & silencer; Human Splice Finder v3.0 <sup>27</sup> )                                    | KS_10306                               |

VUS = Variant of Unknown Significance

\*Novel Mutation (novel variant at known mutation site)

**Supplementary Table 1. Reported pathogenicity of the complete list of ABCA4 mutations.**
