# Supplementary material for: Correlating Photoreceptor Mosaic Structure to Clinical Findings in Stargardt Disease
Source: PubMed Central journal article supplement — Transl Vis Sci Technol. 2016 Mar 11;5(2):6. doi: 10.1167/tvst.5.2.6 (PMC4790429; doi:10.1167/tvst.5.2.6), 2016-03-11
Supplement: i2164-2591-5-2-6-s02.pdf [file i2164-2591-5-2-6-s02.pdf]

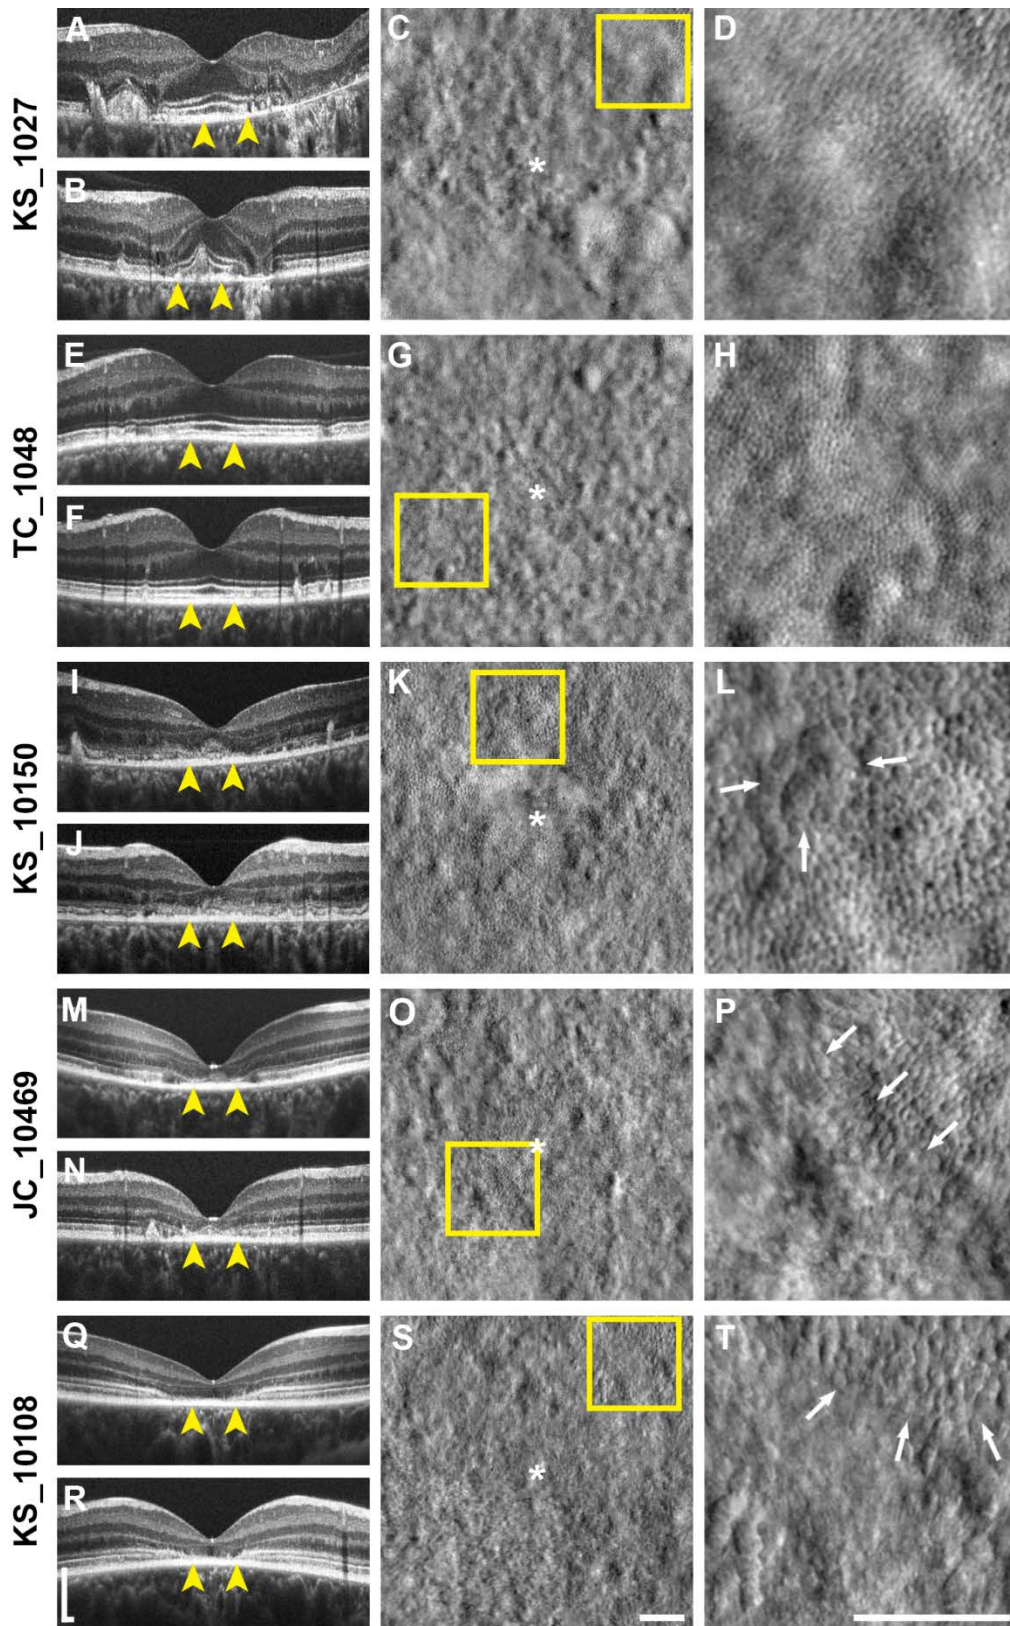

**Supplementary Figure 1. Spectrum of foveal changes.** Horizontal (A, E, I, M, Q) and vertical (B, F, J, N, R) OCT scans. *Arrowheads* denote the outer edges of the region imaged in C, G, K, O and S. *Scale bar* = 200  $\mu\text{m}$ . Split-detection montages (C, G, K, O, S) showing spectrum of foveal structure from intact foveal structure (C,G,K,O) to foveal atrophy (S). *Boxes* represent cropped images in column 3 and *asterisks* represent foveal center. (D, H, L, P, T) Images showing close to normal cone density (D, H), transition zone from retained retinal structure to atrophy (P; *arrows*), and a region of polygonal structures hypothesized to be hypertrophied RPE cells (L,T; *arrows*). *Scale bar* = 100  $\mu\text{m}$ .
