# Supplementary material for: Correlating Photoreceptor Mosaic Structure to Clinical Findings in Stargardt Disease
Source: PubMed Central journal article supplement — Transl Vis Sci Technol. 2016 Mar 11;5(2):6. doi: 10.1167/tvst.5.2.6 (PMC4790429; doi:10.1167/tvst.5.2.6), 2016-03-11
Supplement: i2164-2591-5-2-6-s04.pdf [file i2164-2591-5-2-6-s04.pdf]

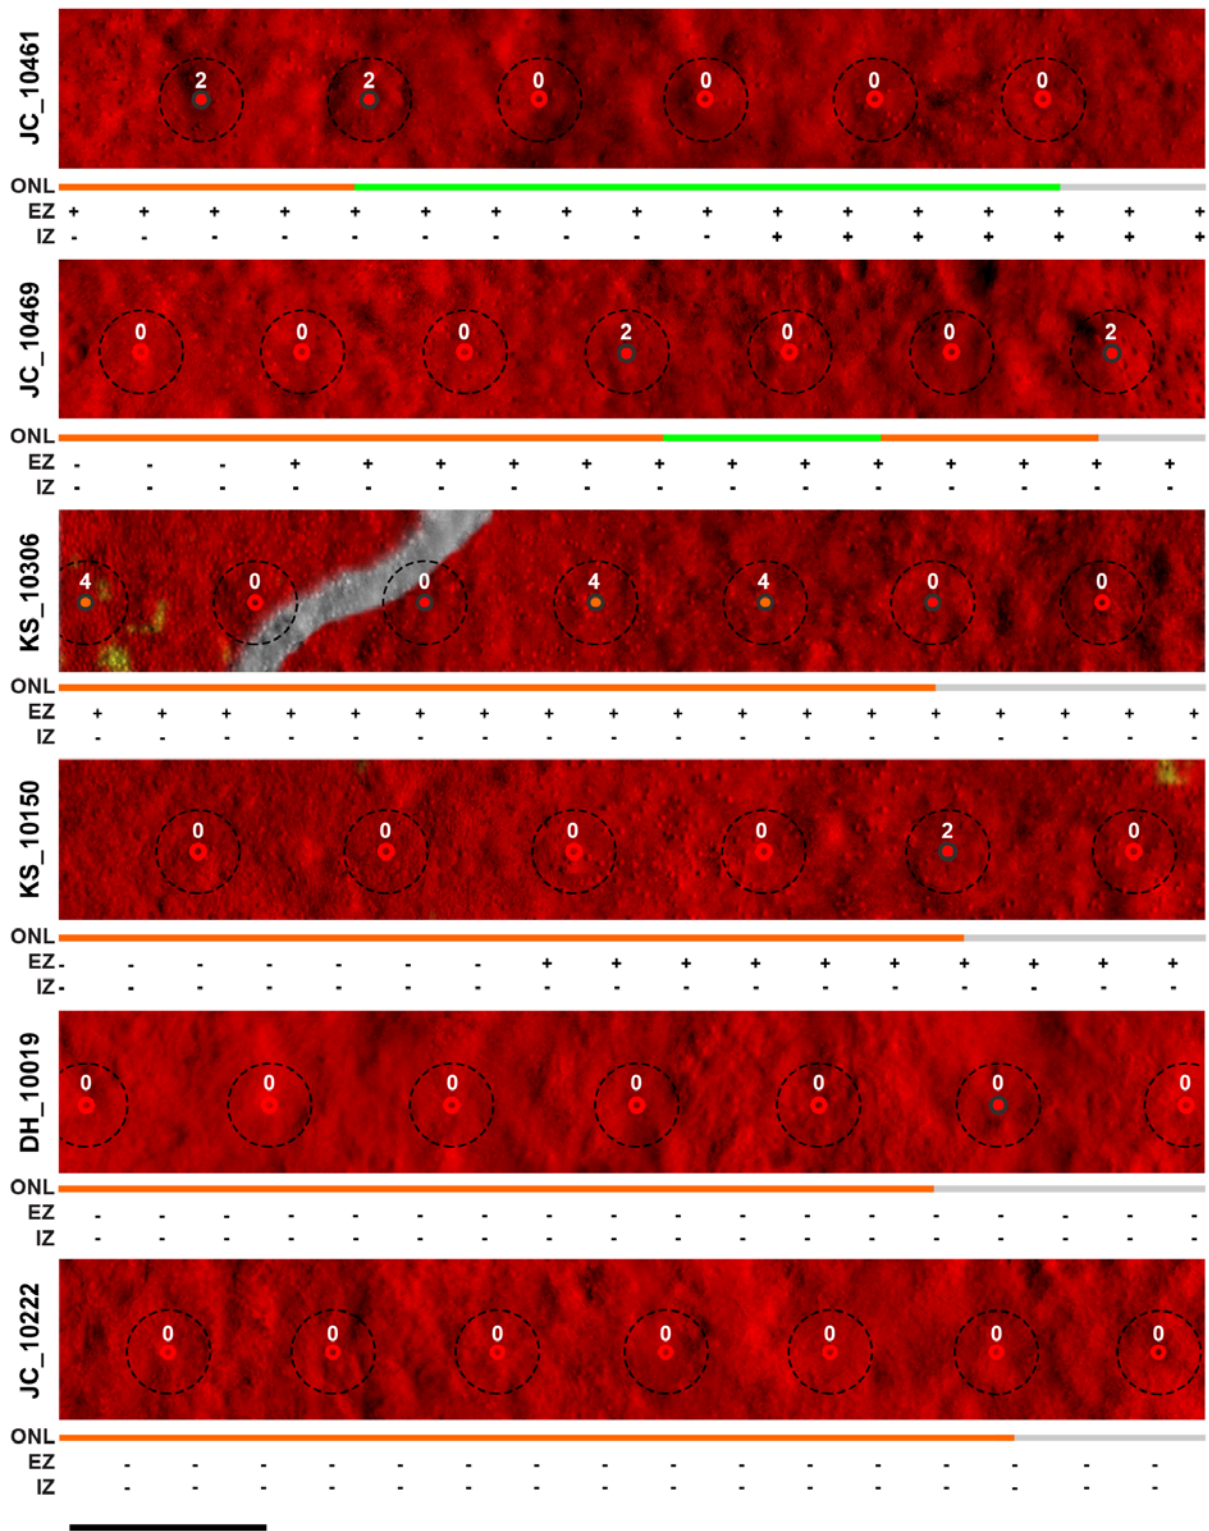

**Supplementary Figure 3. Deviation map overlays on split-detection images combined with OCT data.** Each panel consists of a standard deviation map overlaid on a split-detection montage and superimposed microperimetry data for one subject. ONL, EZ and IZ data are displayed beneath each panel. All panels are shown as left eye equivalents extending from 2° (left side of the panel) to 8° (right side of the panel) temporal to the fovea. Green, Yellow, Orange and Red represent 2, 3, 3+ and 4+ SDs respectively from normal mean for cone density and ONL thickness data. Grey represents unanalyzable data due to presence of blood vessels or unsatisfactory image quality (in deviation map overlays) and lack of normative data for comparison (in ONL analysis). +/- = present/absent. *Dashed circles* represent the area subtended by each microperimetry data point (reported in dB values in each circle). *Scale bar* = 1°.
